# Supplementary material
Source: PubMed Central journal article supplement (PMC9204390)
Supplement: NIHMS1811631-supplement-1.pdf [file NIHMS1811631-supplement-1.pdf]

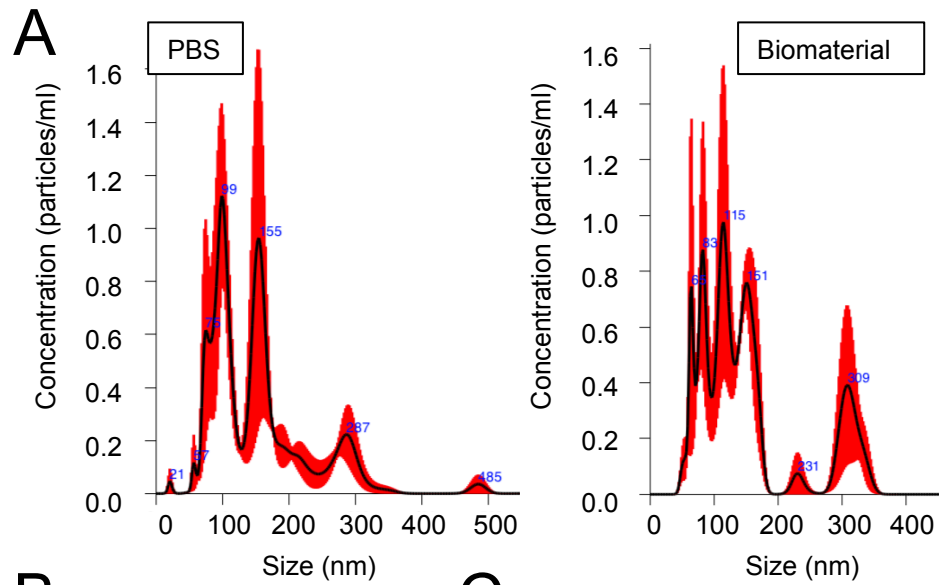

**B**

| sample      | Concentration (particles/ $\mu$ L) |
|-------------|------------------------------------|
| PBS         | $0.439 \times 10^8$                |
| Biomaterial | $0.249 \times 10^8$                |

**C**

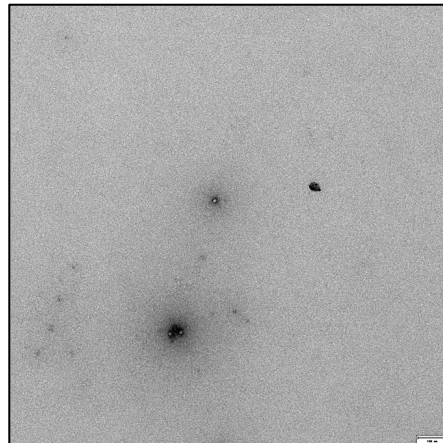

**Supp. Figure 1.**

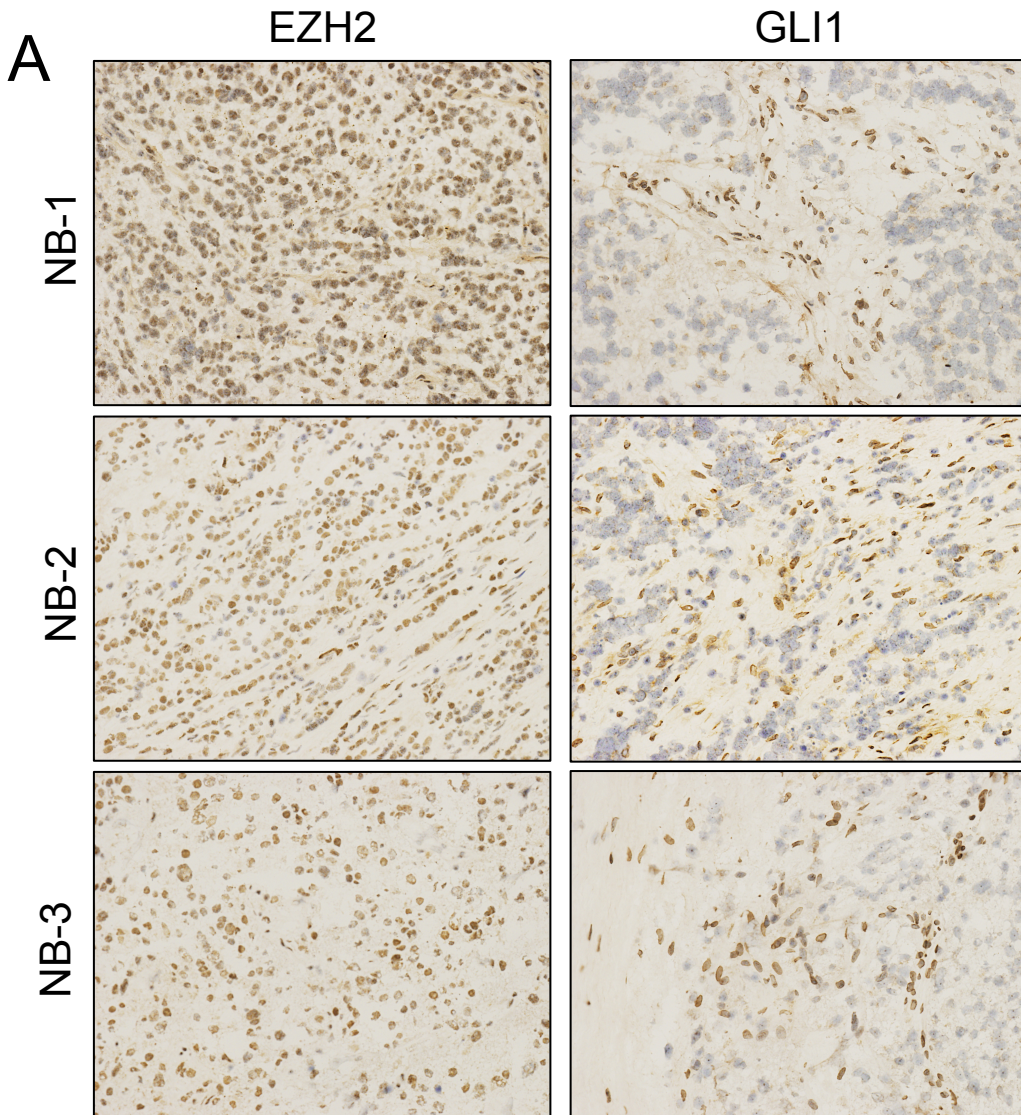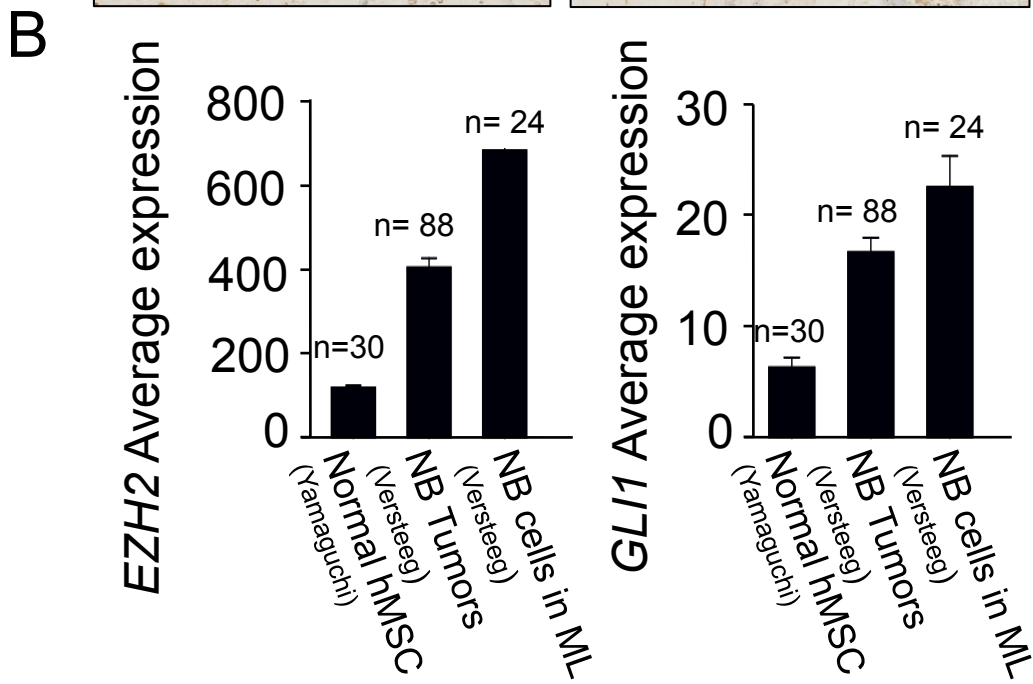

Supp. Figure 2.

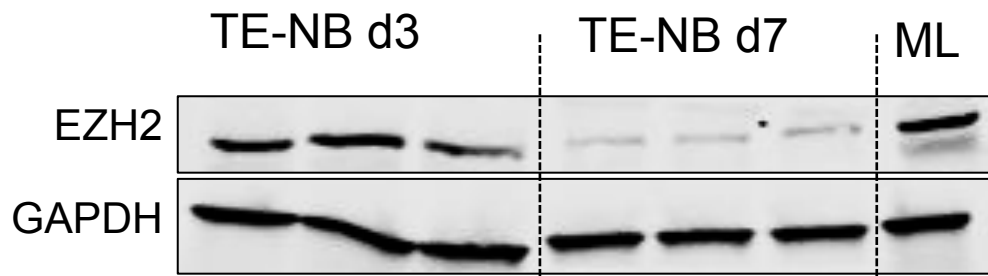

**Supp. Figure 3.**

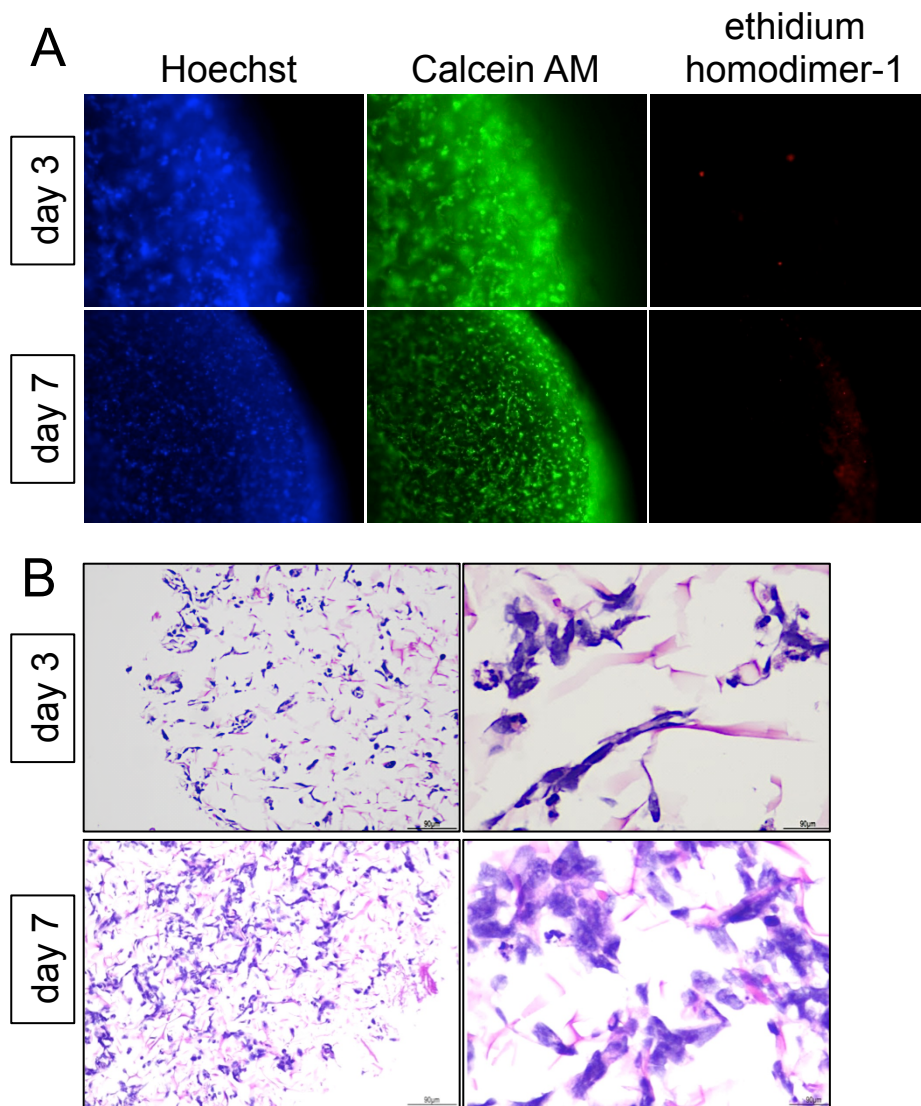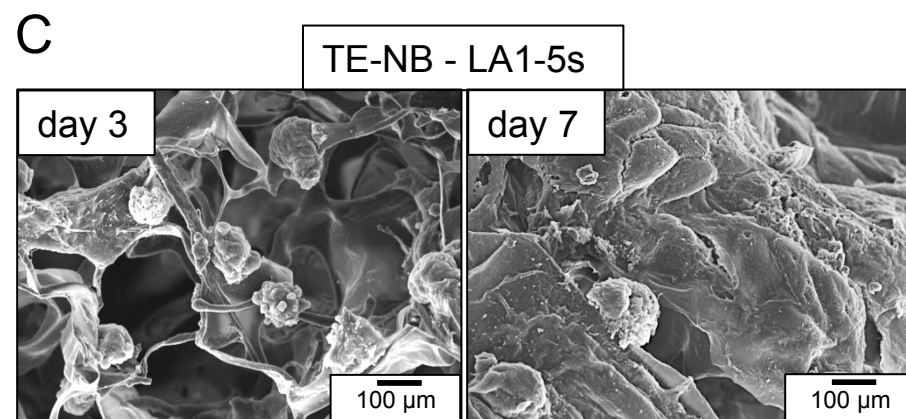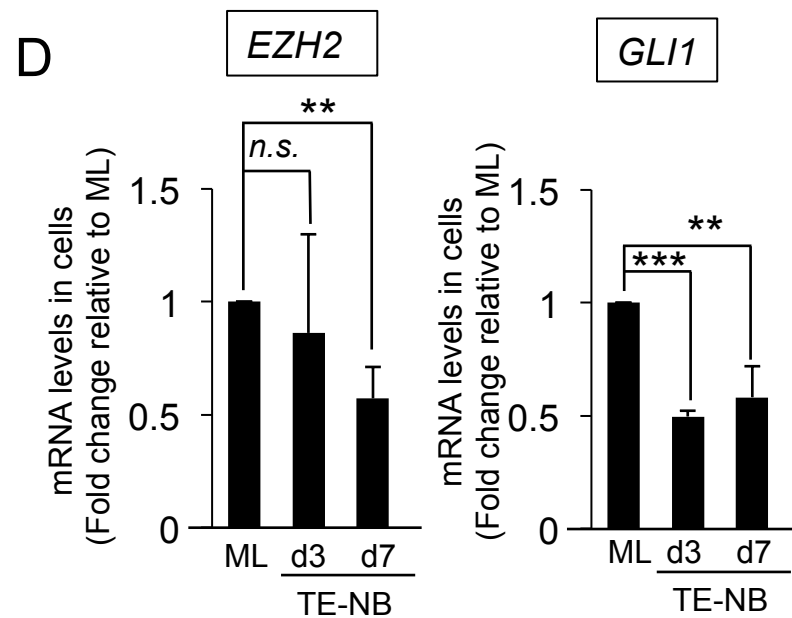

Supp. Figure 4.

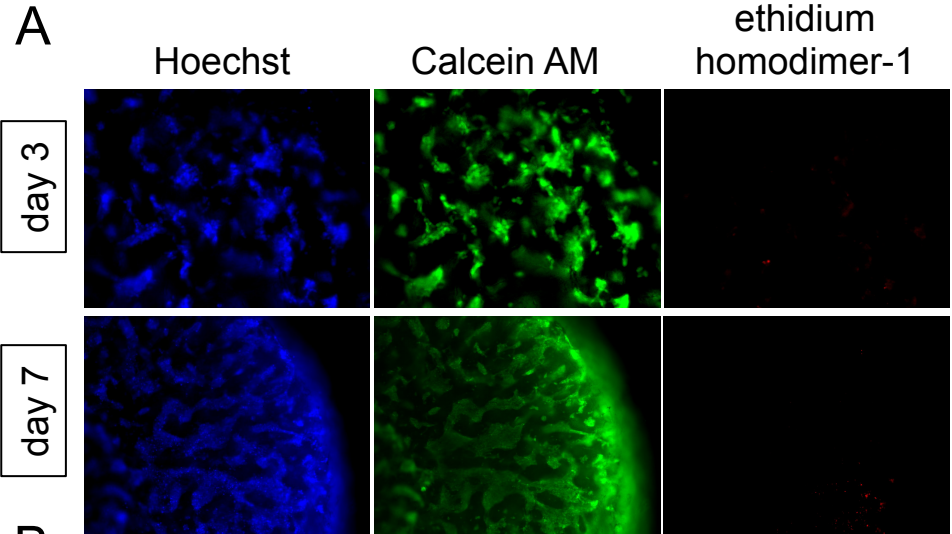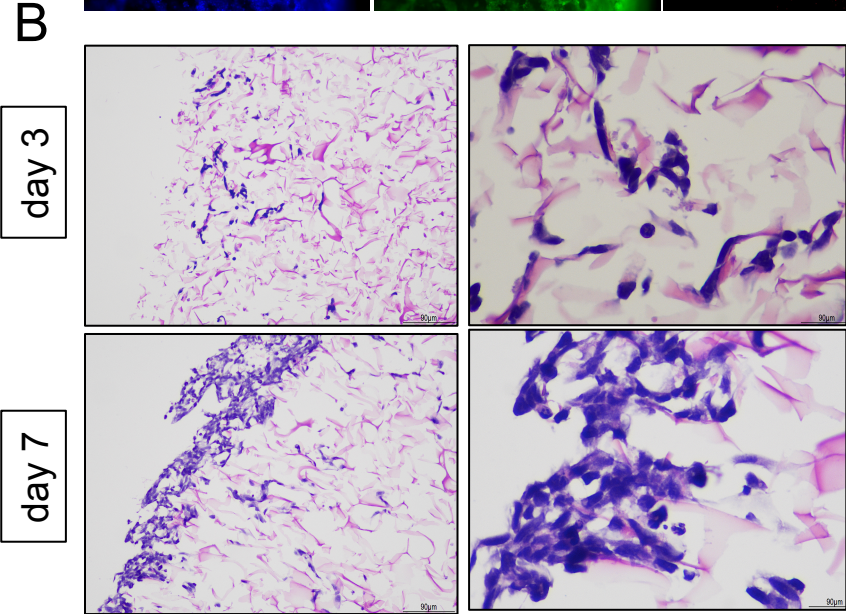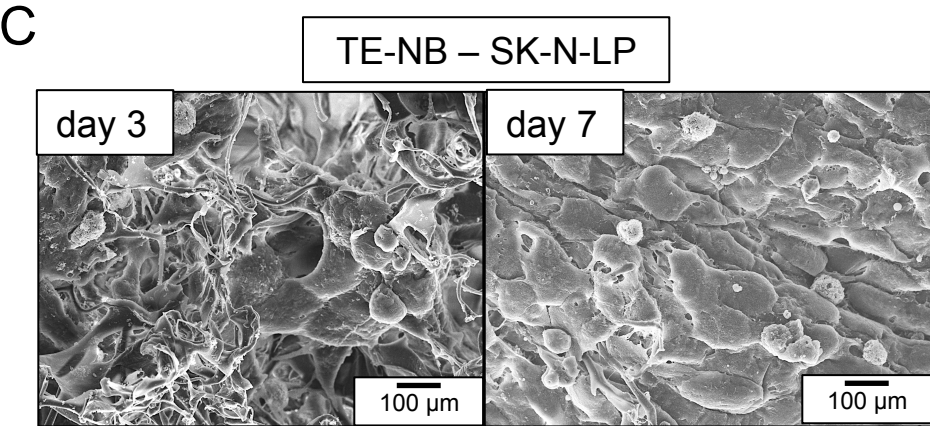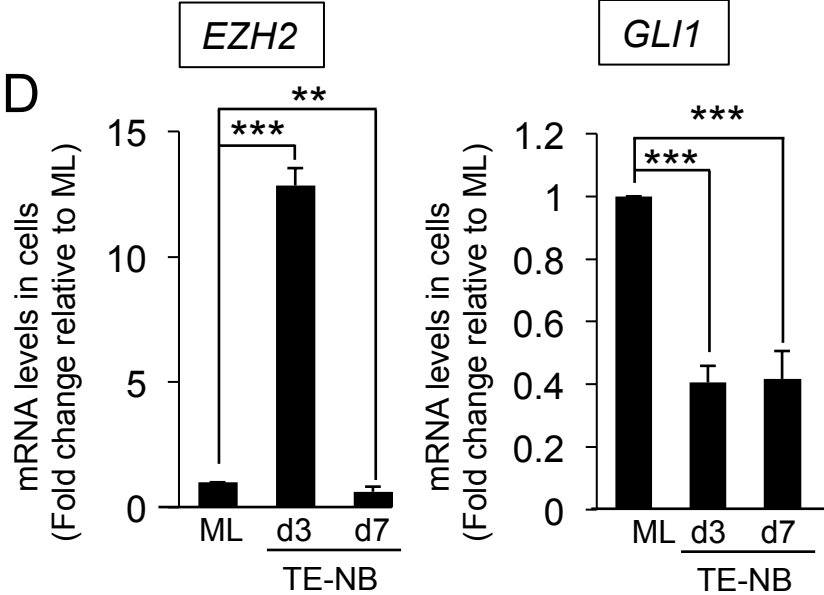

Supp. Figure 5.

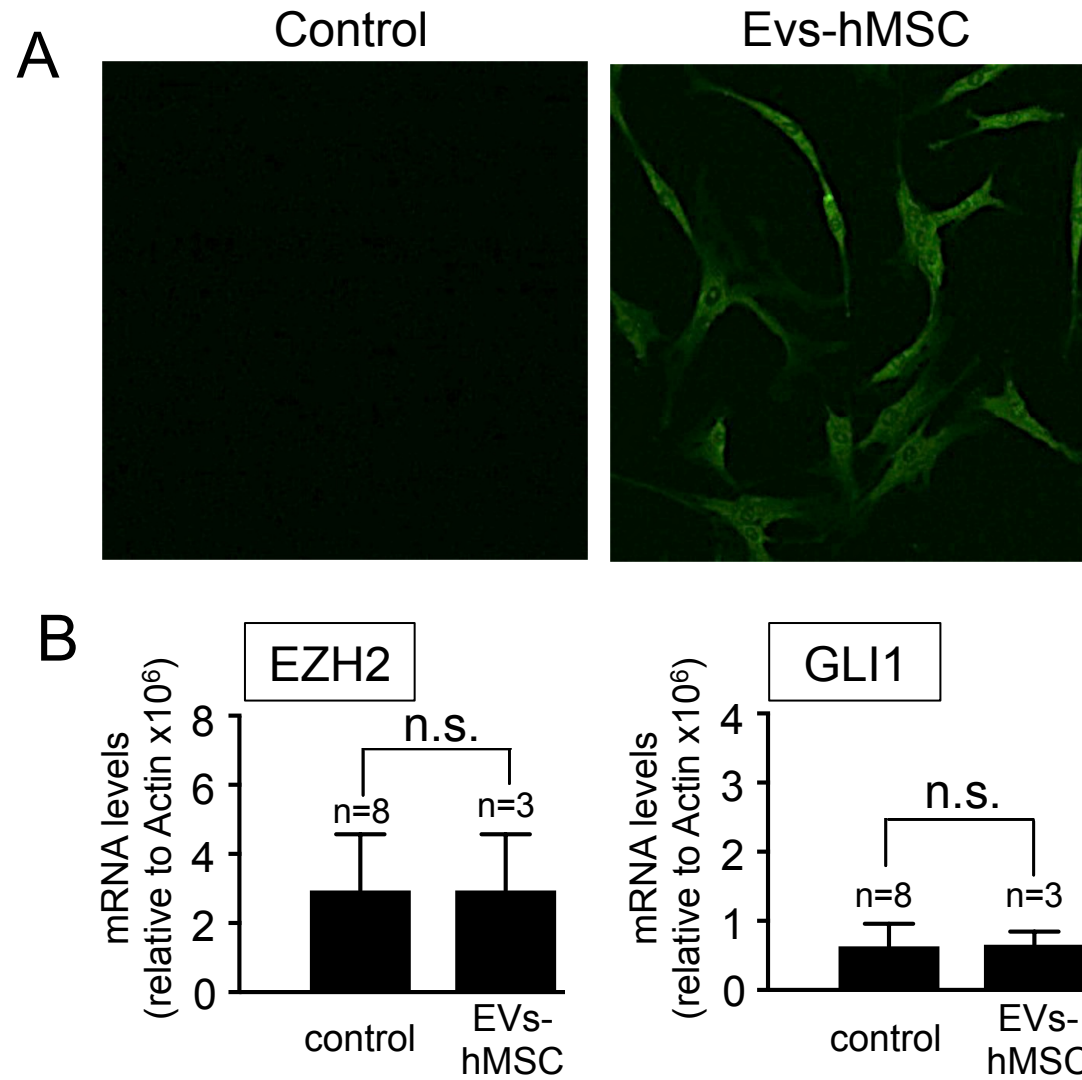

Supp. Figure 6.
